# Supplementary material
Source: PubMed Central journal article supplement (PMC6085884)
Supplement: NIHMS983956-supplement-supplement.pdf [file NIHMS983956-supplement-supplement.pdf]

# Purine Biosynthesis Enzymes in Hippocampal Neurons

Julie Williamson<sup>1</sup>, Ronald S. Petralia<sup>2</sup>, Ya-Xian Wang<sup>2</sup>, Mark P. Mattson<sup>1</sup>  
and Pamela J. Yao<sup>1\*</sup>,

## Electronical Supplementary Material

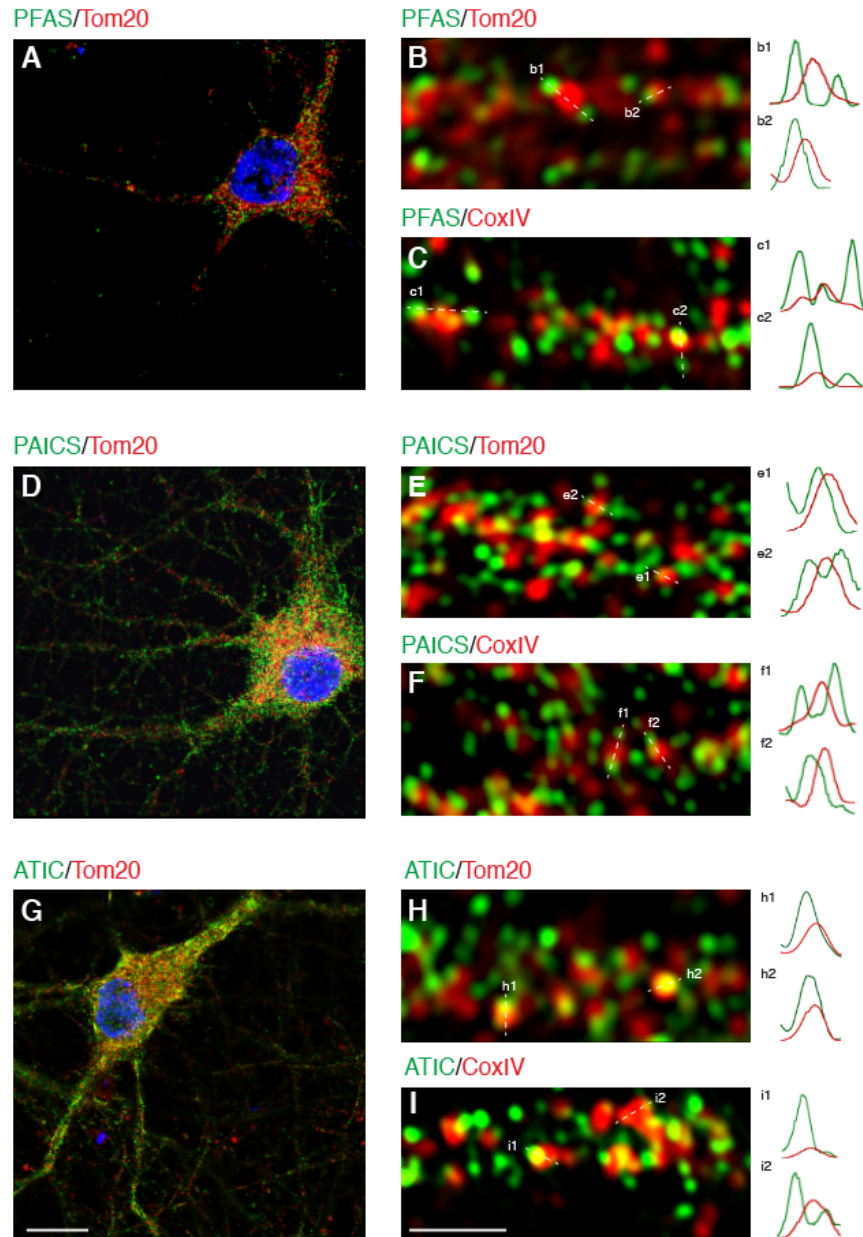

**Supplementary Figure 1.** Additional confocal images of cultured hippocampal neurons co-labeled with antibodies as indicated. Scale bar in G is 10  $\mu\text{m}$  and applies to A,D,G. Scale bar in I is 1  $\mu\text{m}$  and applies to B,C,E,F,H,I.

## Purine Biosynthesis Enzymes in Hippocampal Neurons

Julie Williamson<sup>1</sup>, Ronald S. Petralia<sup>2</sup>, Ya-Xian Wang<sup>2</sup>, Mark P. Mattson<sup>1</sup>  
and Pamela J. Yao<sup>1\*</sup>,

### Electronical Supplementary Material

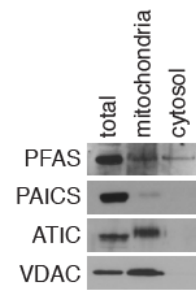

**Supplementary Figure 2.** Additional immunoblots showing the presence of PFAS, PAICS and ATIC in mitochondria isolated from cultured hippocampal neurons.

## Purine Biosynthesis Enzymes in Hippocampal Neurons

Julie Williamson<sup>1</sup>, Ronald S. Petralia<sup>2</sup>, Ya-Xian Wang<sup>2</sup>, Mark P. Mattson<sup>1</sup>  
and Pamela J. Yao<sup>1\*</sup>,

### Electronical Supplementary Material

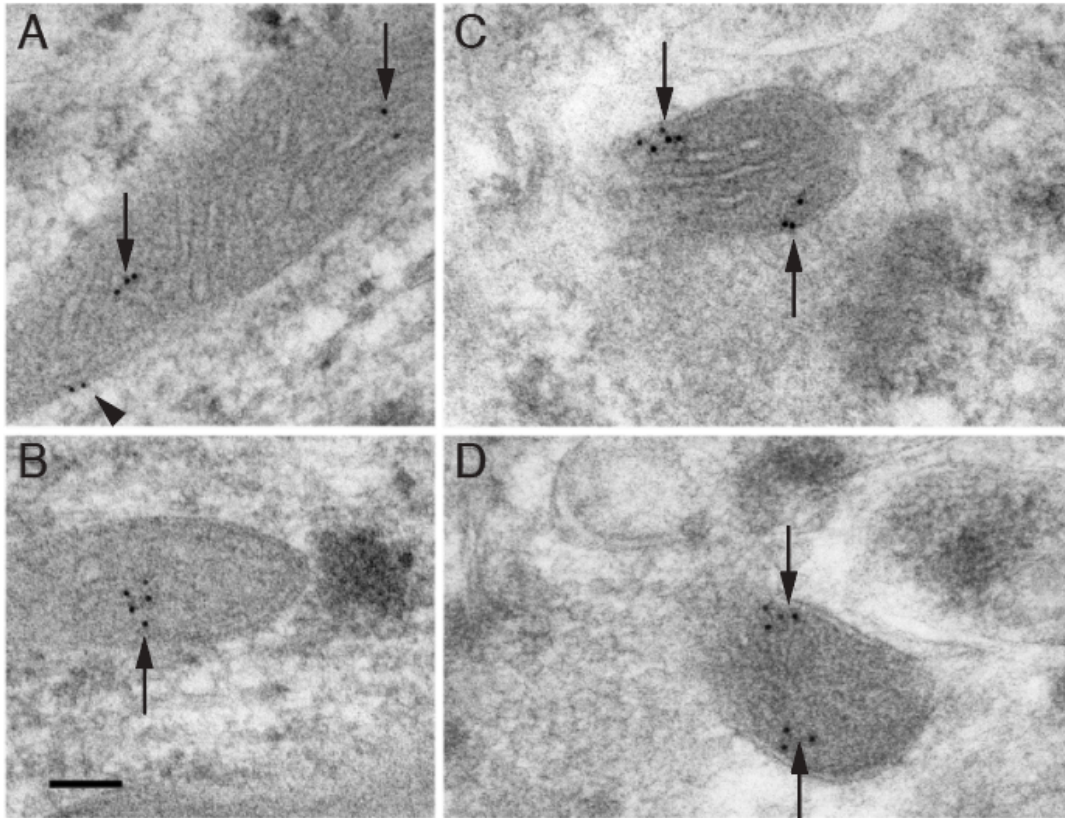

**Supplementary Figure 3.** Additional examples of immunogold labeling for PAICS in the hippocampus. Notice PAICS immunogold particles locate either near the surface (arrowhead) or within (arrows) mitochondria. **A,B**, dendrites of hippocampal neurons of CA1; **C**, a presynaptic terminal of CA1; **D**, a mossy terminal of CA3. Scale bar in **B** is 100 nm and applies all micrographs.
